# Supplementary material for: Human-Borne Pathogens: Are They Threatening Wild Great Ape Populations?
Source: MDPI journal article supplement (doi:10.3390/vetsci9070356), 2022-07-13
Supplement: s1 [file s1]

**Table S1.** Estimated size of current great ape populations globally.

| Country                          | Status     | <i>Gorilla<br/>beringei</i> | <i>Gorilla<br/>gorilla</i> | <i>Pan<br/>troglodytes</i> | <i>Pan<br/>paniscus</i> | <i>Pongo abelii</i>       | <i>Pongo<br/>pygmaeus</i> | Reference(s)      |
|----------------------------------|------------|-----------------------------|----------------------------|----------------------------|-------------------------|---------------------------|---------------------------|-------------------|
| Cameroon                         | Total      | –                           | 34,700                     | 23,800                     | –                       | –                         | –                         | [122,123]         |
|                                  | Habituated | –                           | 100                        | Unknown                    | –                       | –                         | –                         |                   |
| Central African Republic         | Total      | –                           | Unknown                    | 3,700                      | –                       | –                         | –                         | [124]             |
|                                  | Habituated | –                           | Unknown                    | Unknown                    | –                       | –                         | –                         |                   |
| Côte d’Ivoire                    | Total      | –                           | –                          | 1,095                      | –                       | –                         | –                         | [125]             |
|                                  | Habituated | –                           | –                          | 150                        | –                       | –                         | –                         | [126]             |
| Democratic Republic of the Congo | Total      | 4,083                       | 189,600                    | 200,000                    | 20,000                  | –                         | –                         | [122,123,127,128] |
|                                  | Habituated |                             | 339                        | 400                        | Unknown                 | –                         | –                         |                   |
| Gabon                            | Total      | –                           | 85,300                     | Unknown                    | –                       | –                         | –                         | [122,123]         |
|                                  | Habituated | –                           | 100                        | 100                        | –                       | –                         | –                         | [129]             |
| Gambia                           | Total      | –                           | –                          | –                          | –                       | –                         | –                         | [125]             |
|                                  | Habituated | –                           | –                          | –                          | –                       | –                         | –                         |                   |
| Guinea Bissau                    | Total      | –                           | –                          | 1,908                      | –                       | –                         | –                         | [125]             |
|                                  | Habituated | –                           | –                          | Unknown                    | –                       | –                         | –                         |                   |
| Indonesia                        | Total      | –                           | –                          | –                          | –                       | 6,660/14,613 <sup>2</sup> | 54,000                    | [1,32,130,131]    |
|                                  | Habituated | –                           | –                          | –                          | –                       | Unknown                   | Unknown                   |                   |
| Republic of Congo                | Total      | –                           | 6300                       | 56,000                     | –                       | –                         | –                         | [122,123]         |
|                                  | Habituated | –                           | 50                         | 40                         | –                       | –                         | –                         | [132]             |
| Rwanda                           | Total      | 182                         | –                          | 400                        | –                       | –                         | –                         | [16,123,127]      |
|                                  | Habituated | 182                         | –                          | Unknown                    | –                       | –                         | –                         | [16]              |
| Senegal                          | Total      | –                           | –                          | 2,642                      | –                       | –                         | –                         | [125]             |
|                                  | Habituated | –                           | –                          | 35                         | –                       | –                         | –                         | [132]             |
| Tanzania                         | Total      | –                           | –                          | 2,500                      | –                       | –                         | –                         | [123]             |
|                                  | Habituated | –                           | –                          | 150                        | –                       | –                         | –                         | [133]             |
| Uganda                           | Total      | 414                         | –                          | 4,950                      | –                       | –                         | –                         | [16,134,135]      |
|                                  | Habituated | 75 <sup>1</sup>             | –                          | 300                        | –                       | –                         | –                         | [136]             |

<sup>1</sup>Primates of Western Uganda.

<sup>2</sup>Amounts estimated by authors based on available published data.
